# Supplementary figures and images for: Notch signalling regulates stem cell numbers in vitro and in vivo
Source: Springer Nature journal article supplement (doi:10.1038/nature04940), 2006-06-22

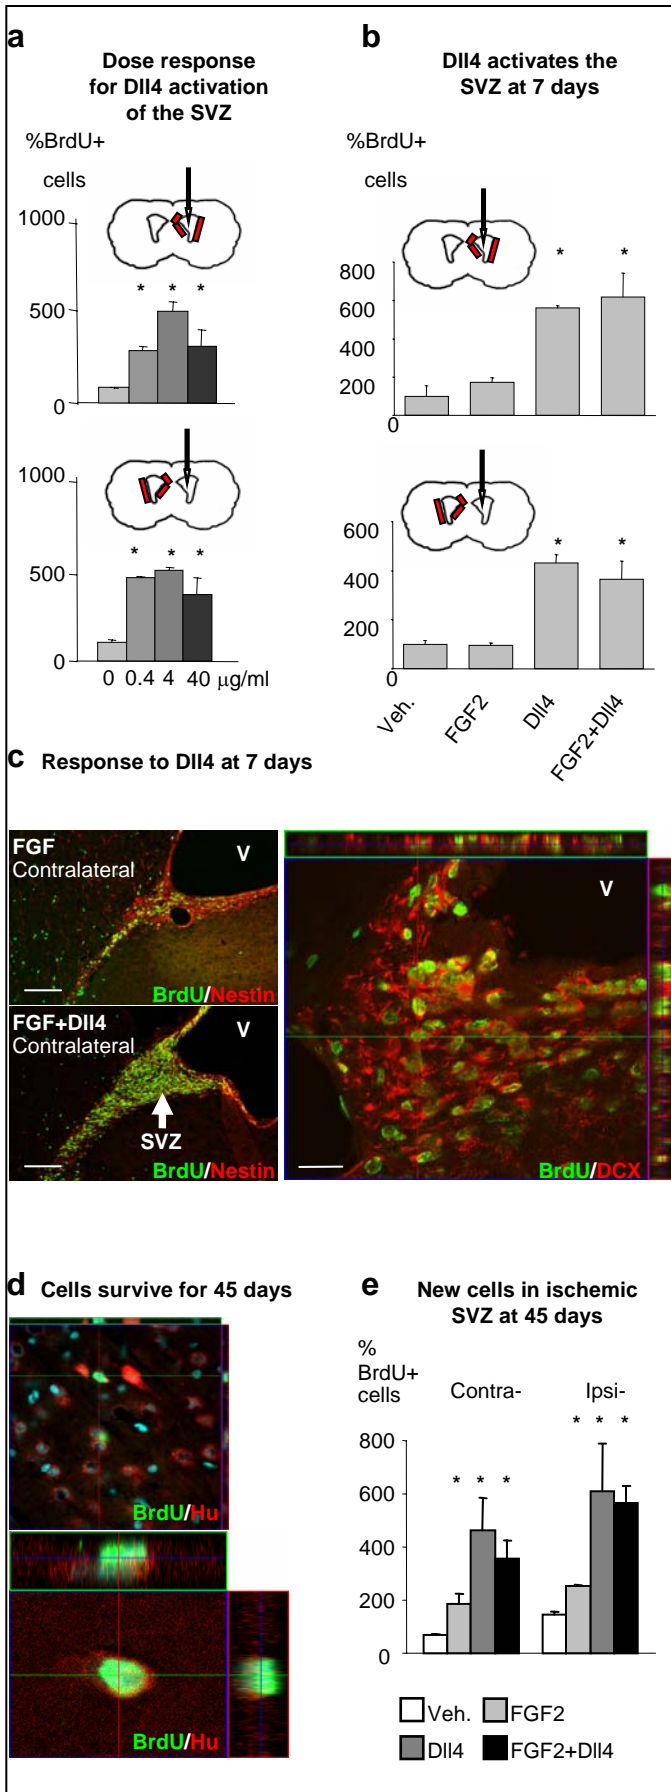

Supplement: nature04940-s3.pdf [file nature04940-s3.pdf]
